# Supplementary material for: Decisive Data Sets in Phylogenomics: Lessons from Studies on the Phylogenetic Relationships of Primarily Wingless Insects
Source: PubMed Central journal article supplement — Mol Biol Evol. 2013 Oct 18;31(1):239–49. doi: 10.1093/molbev/mst196 (PMC3879454; doi:10.1093/molbev/mst196), 2013-10-18
Supplement: supp_mst196_DellAmpio_et_al_Supplementary_Material_Fig_5.pdf [file supp_mst196_DellAmpio_et_al_Supplementary_Material_Fig_5.pdf]

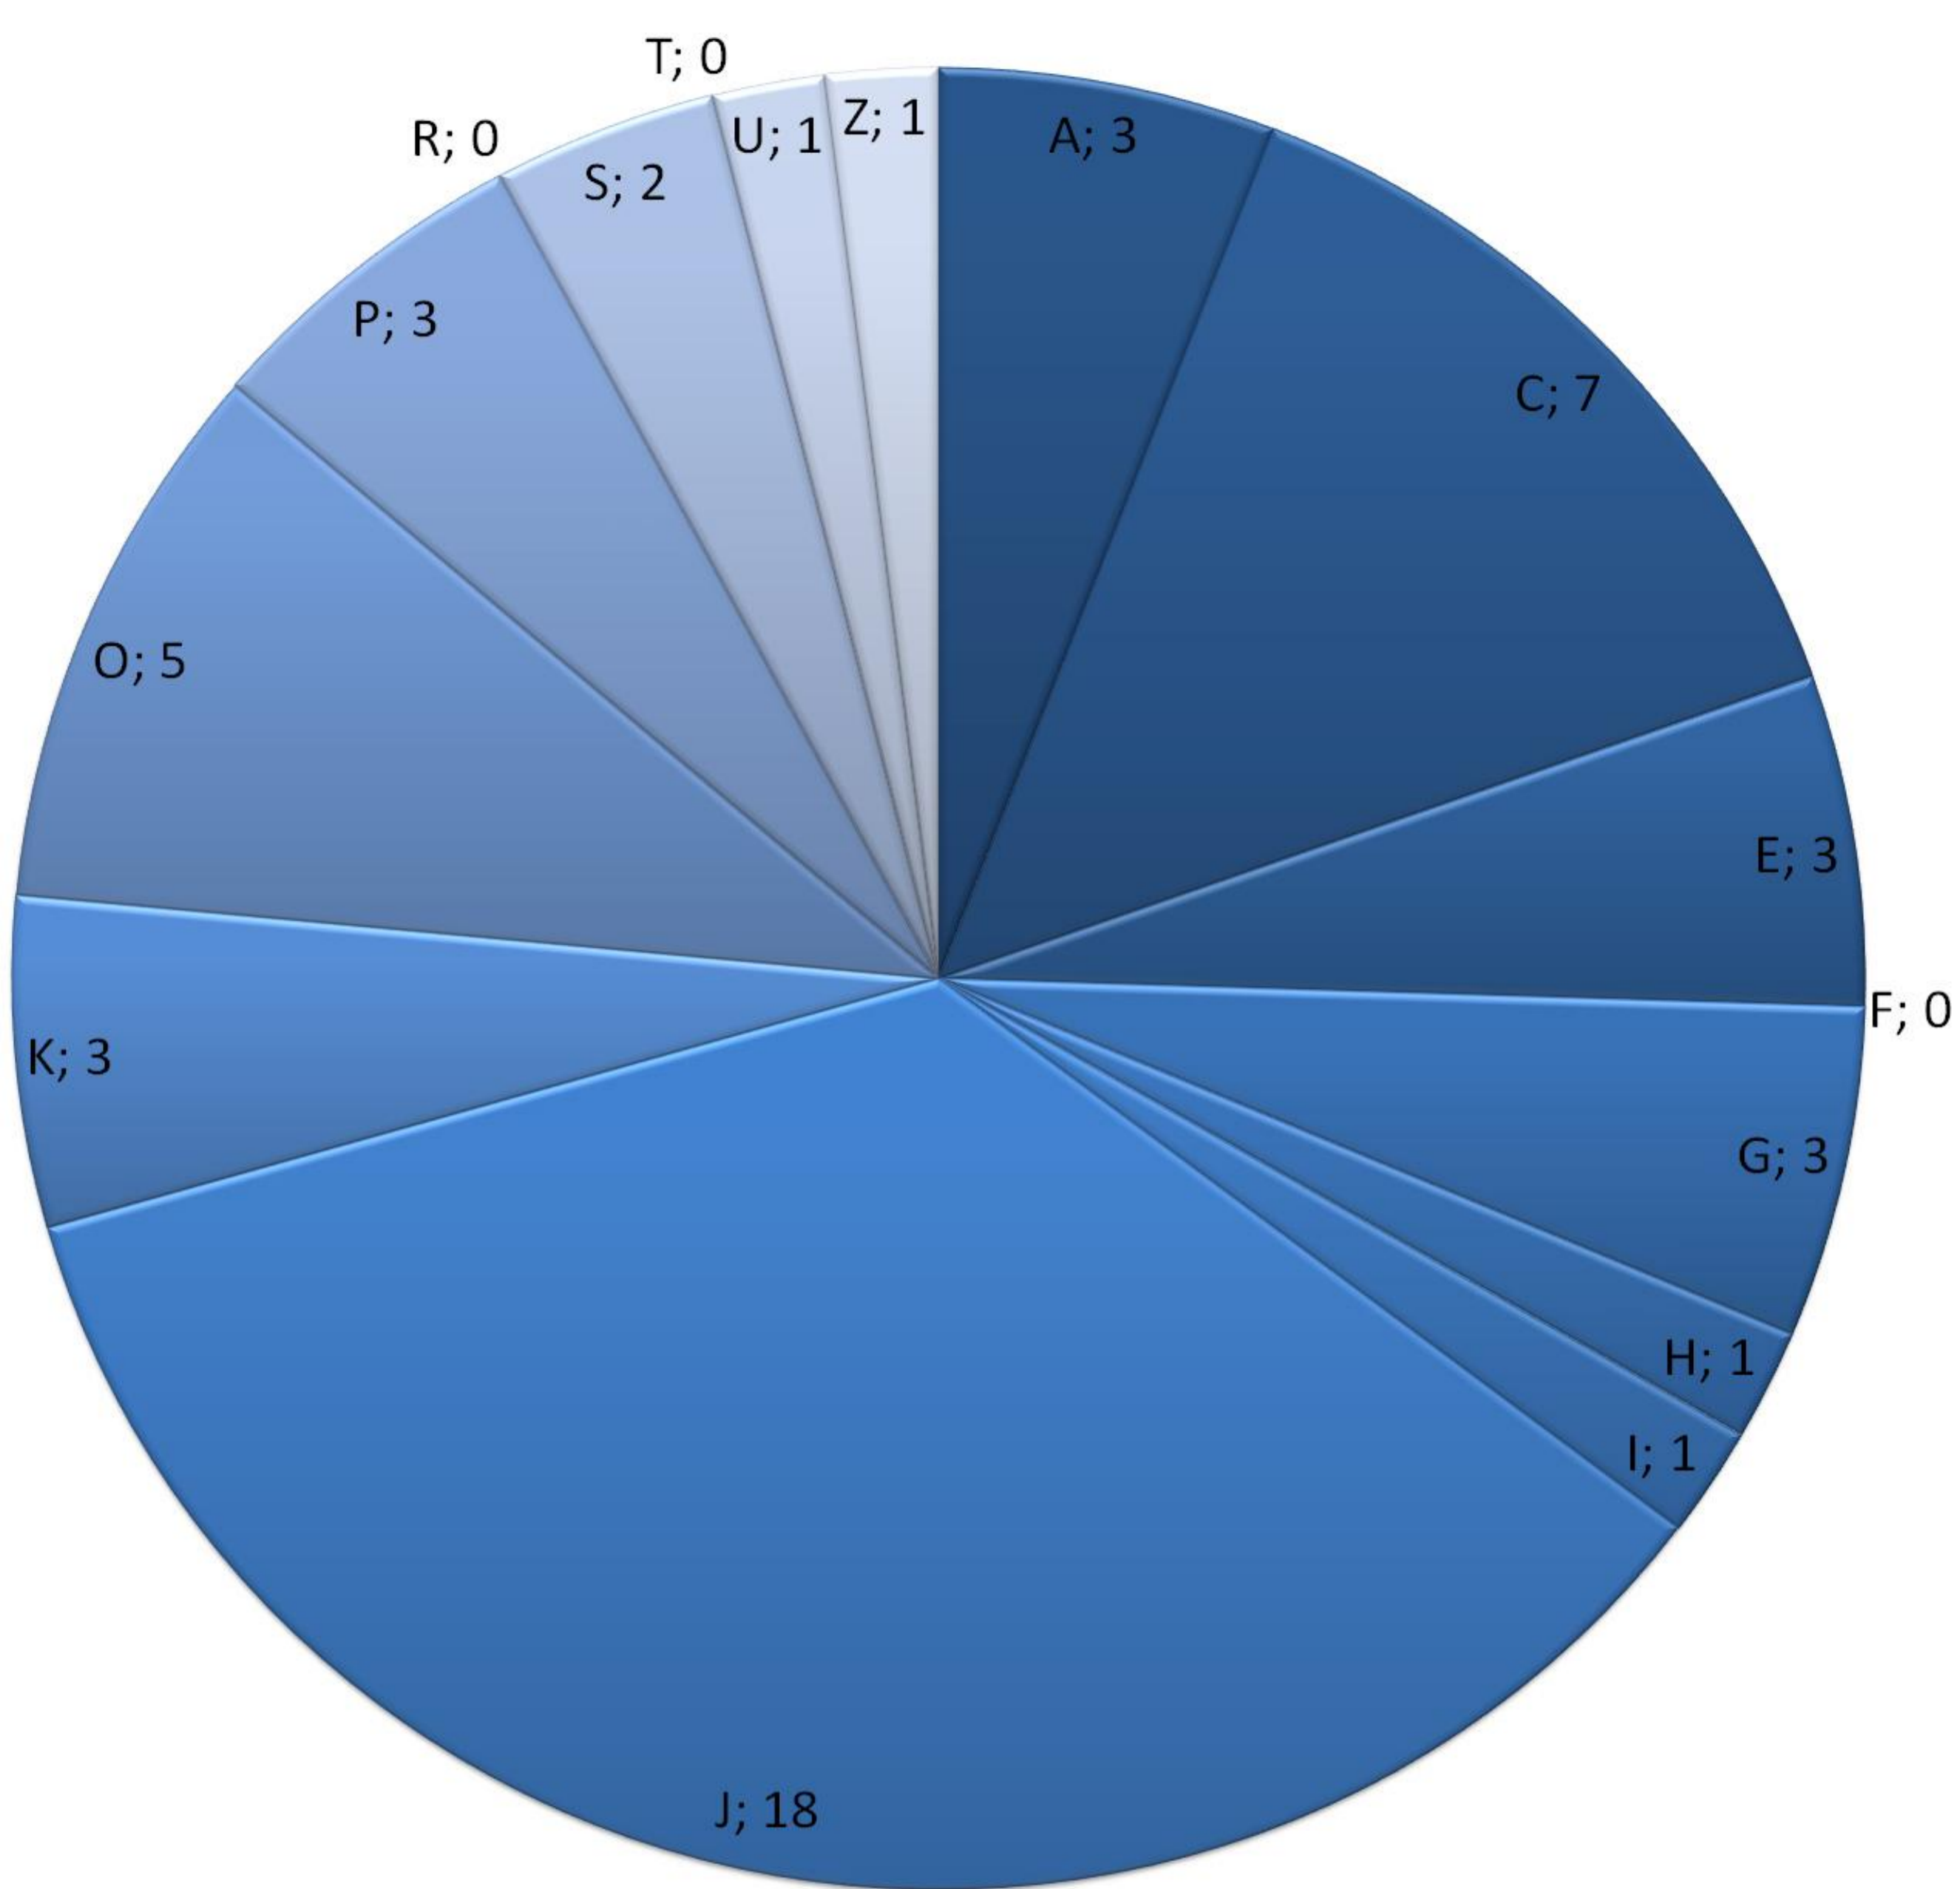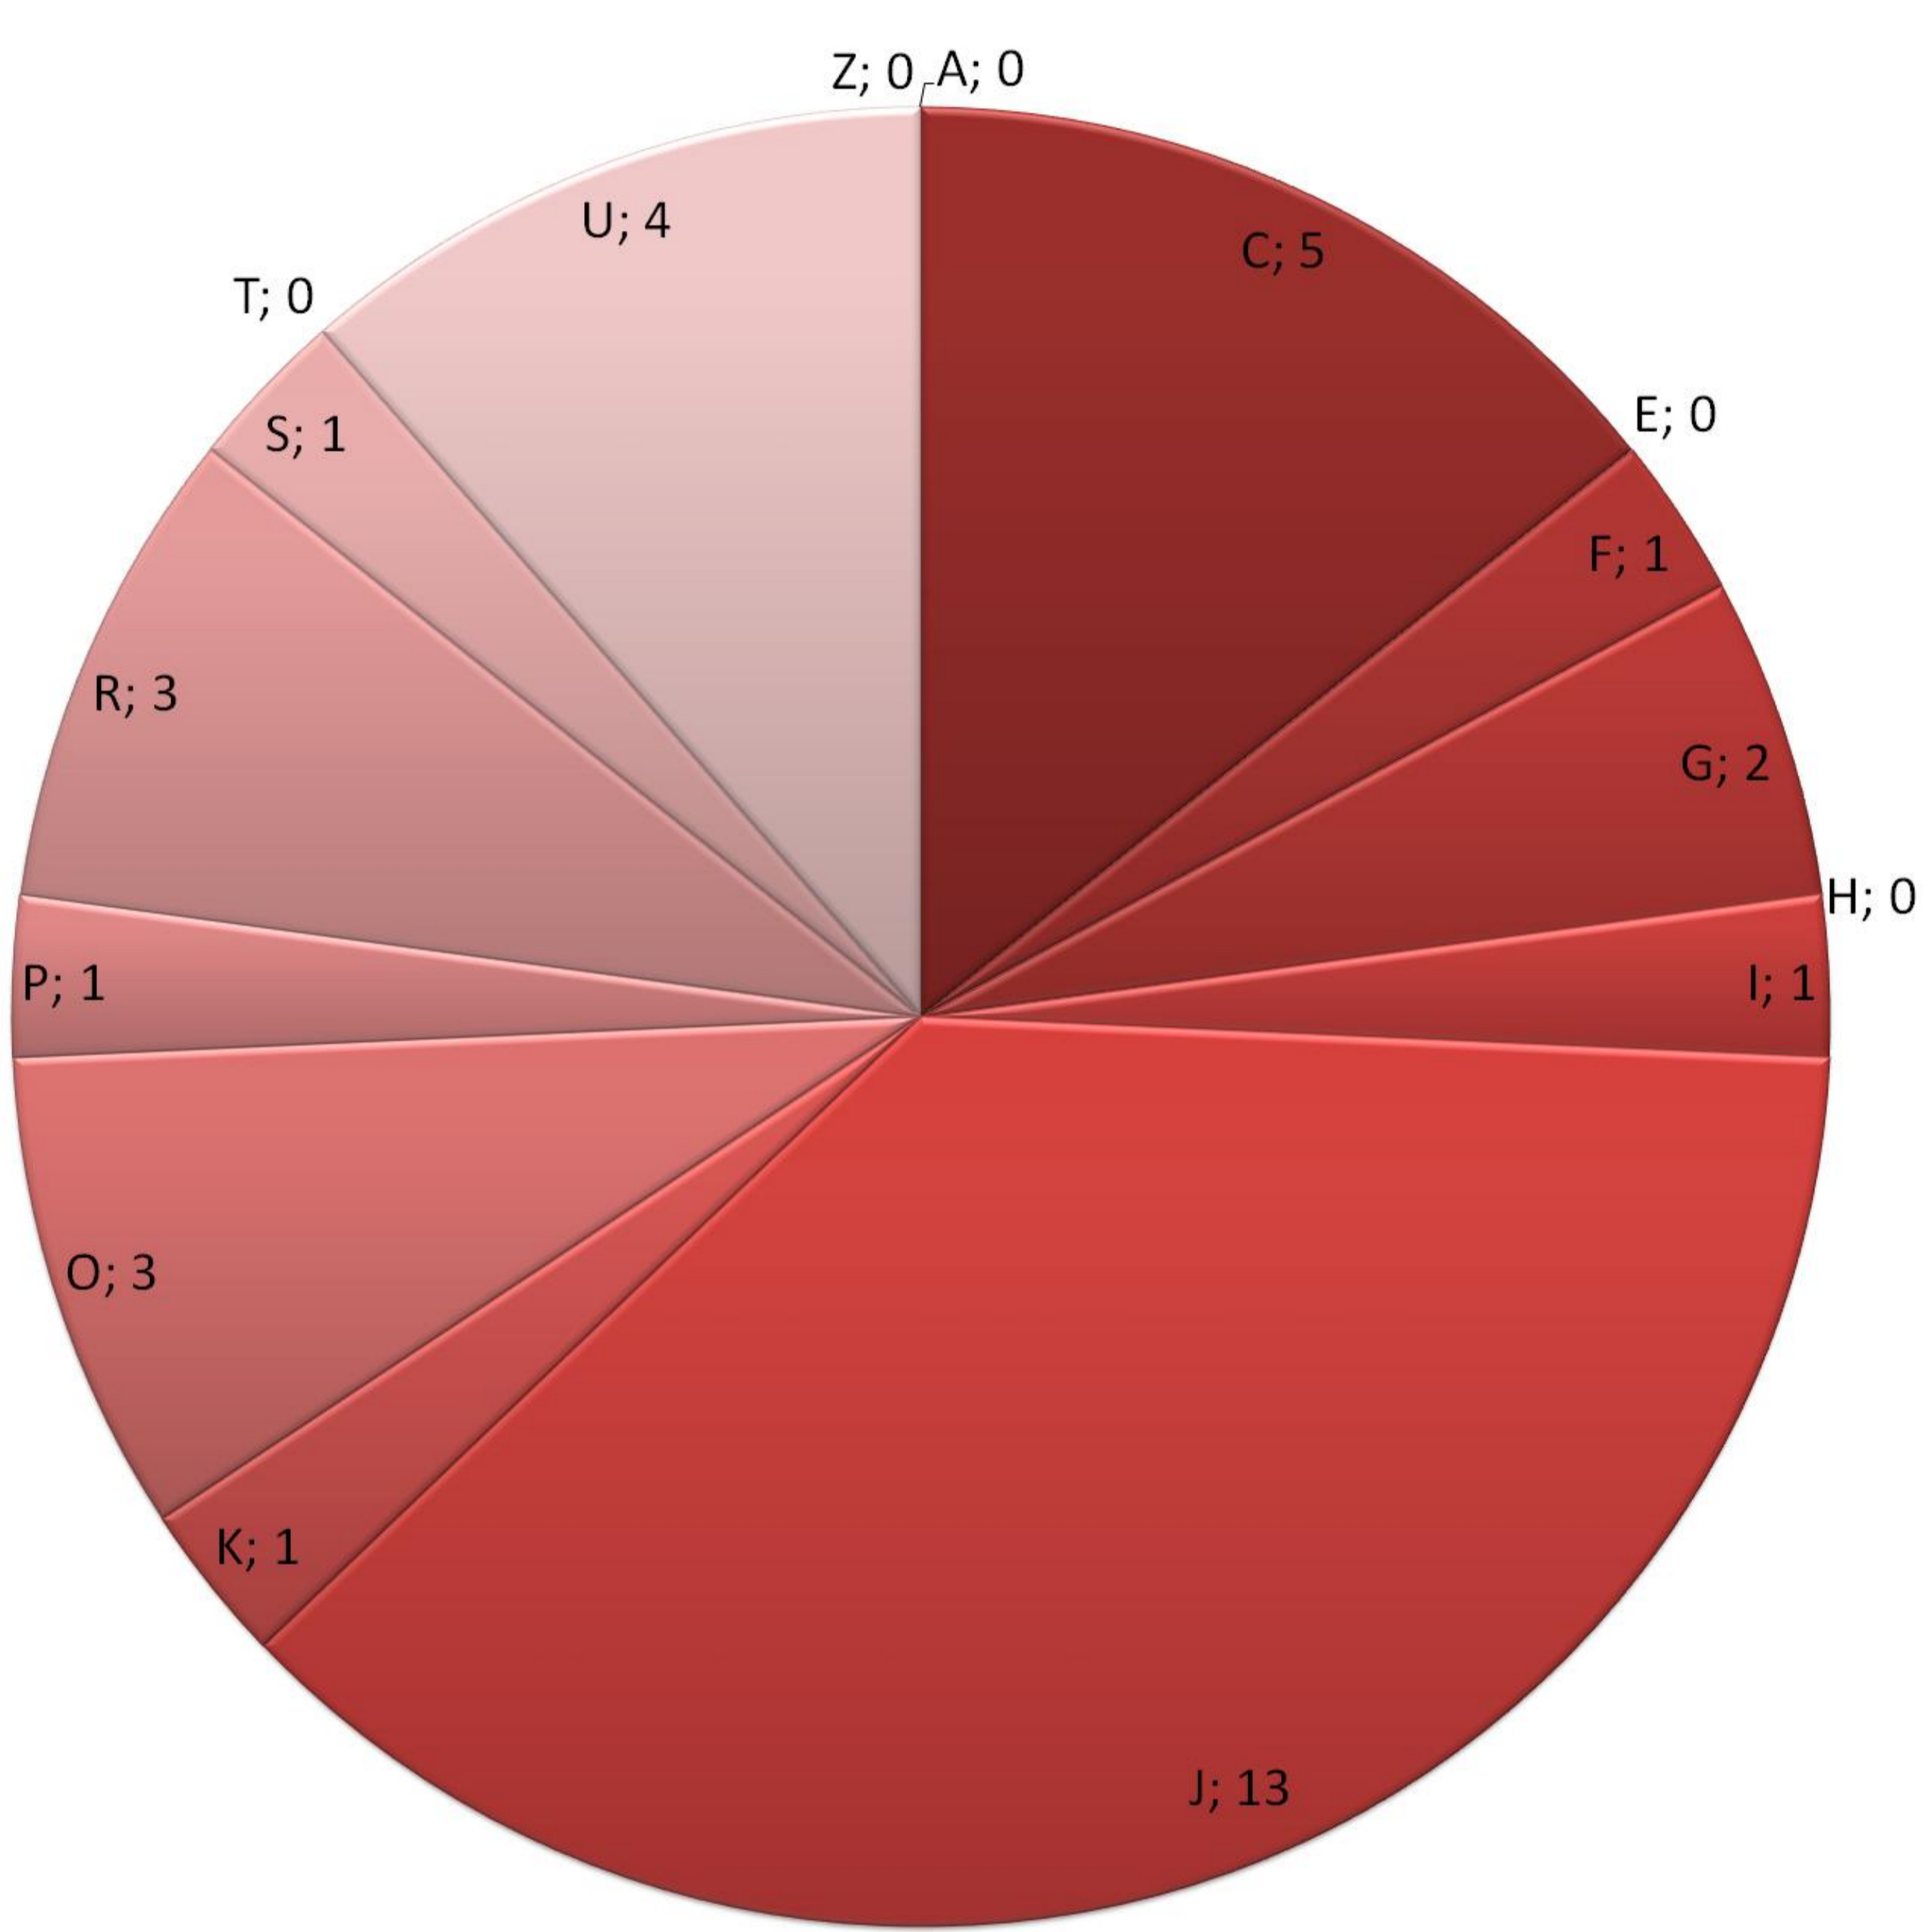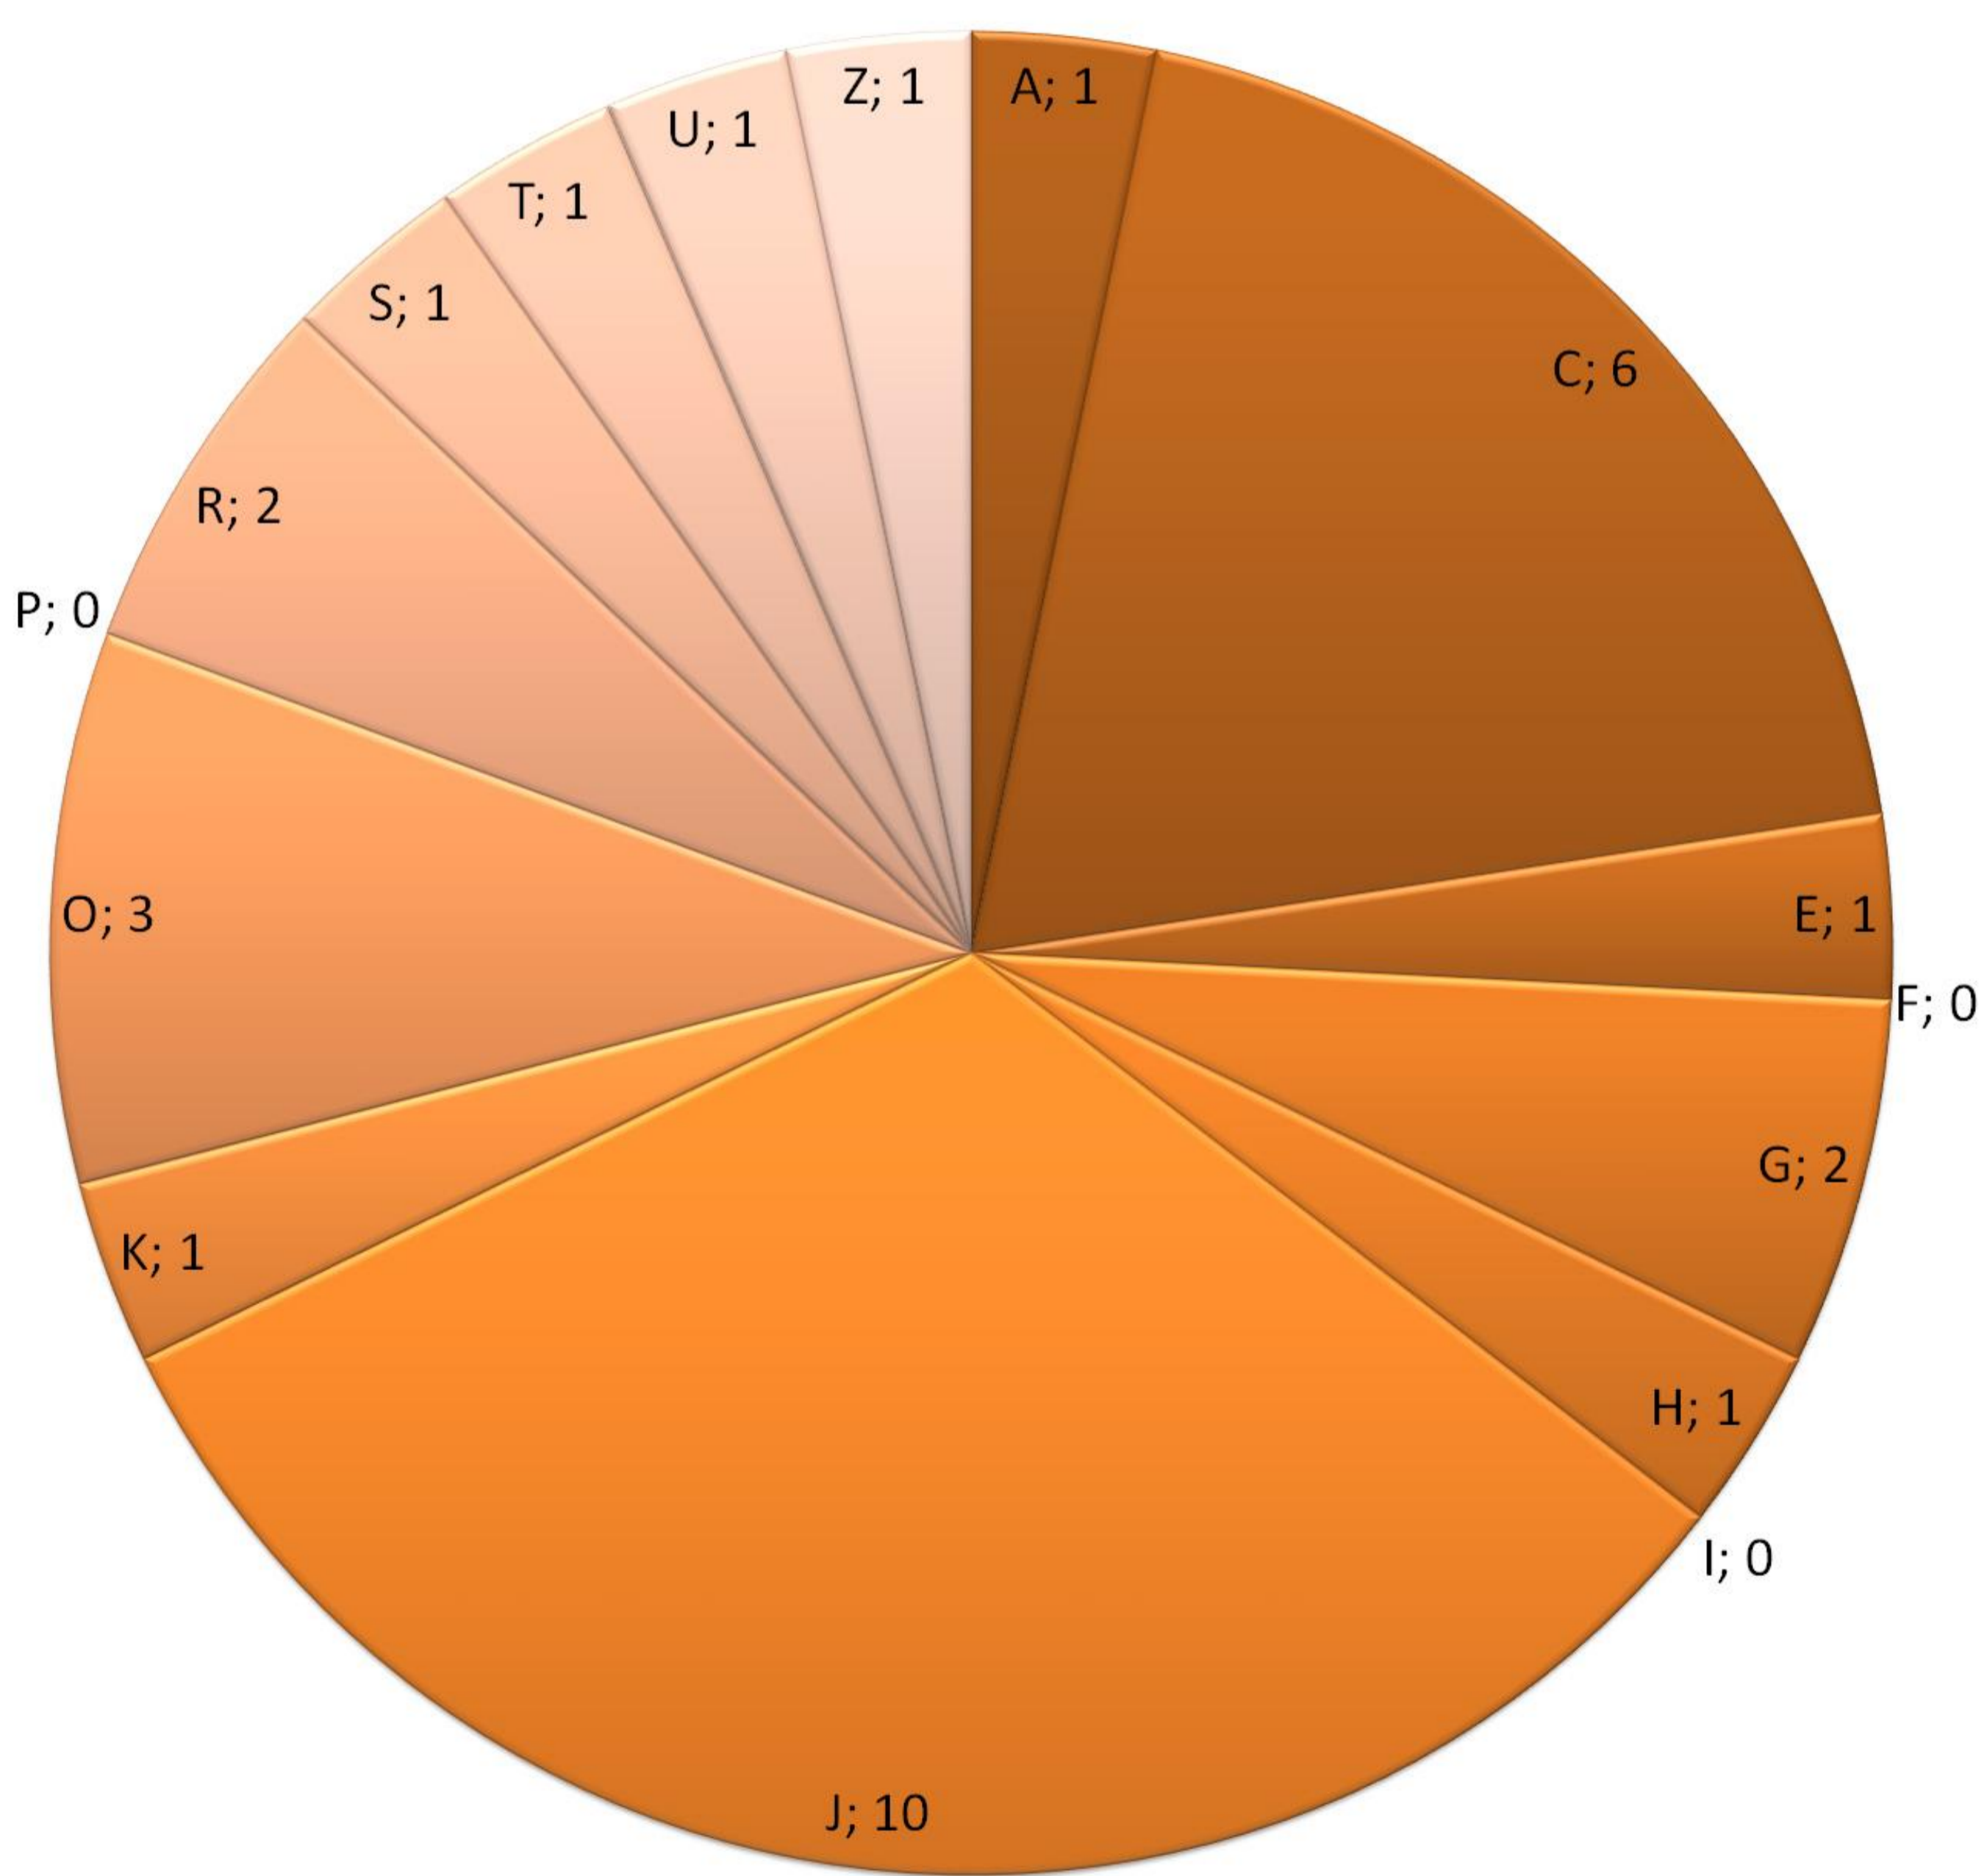

**KOG categories**

- A: RNA processing and modification
- C: Energy production and conversion
- E: Amino acid transport and metabolism
- F: Nucleotide transport and metabolism
- G: Carbohydrate transport and metabolism
- H: Coenzyme transport and metabolism
- I: Lipid transport and metabolism
- J: Translation, ribosomal structure and biogenesis
- K: Transcription
- O: Posttranslational modification, protein turnover, chaperones
- P: Inorganic ion transport and metabolism
- R: General function prediction only
- S: Function unknown
- T: Signal transduction mechanisms
- U: Intracellular trafficking, secretion, and vesicular transport
- Z: Cytoskeleton
