# Supplementary figures and images for: Decisive Data Sets in Phylogenomics: Lessons from Studies on the Phylogenetic Relationships of Primarily Wingless Insects
Source: PubMed Central journal article supplement — Mol Biol Evol. 2013 Oct 18;31(1):239–49. doi: 10.1093/molbev/mst196 (PMC3879454; doi:10.1093/molbev/mst196), 2013-10-18

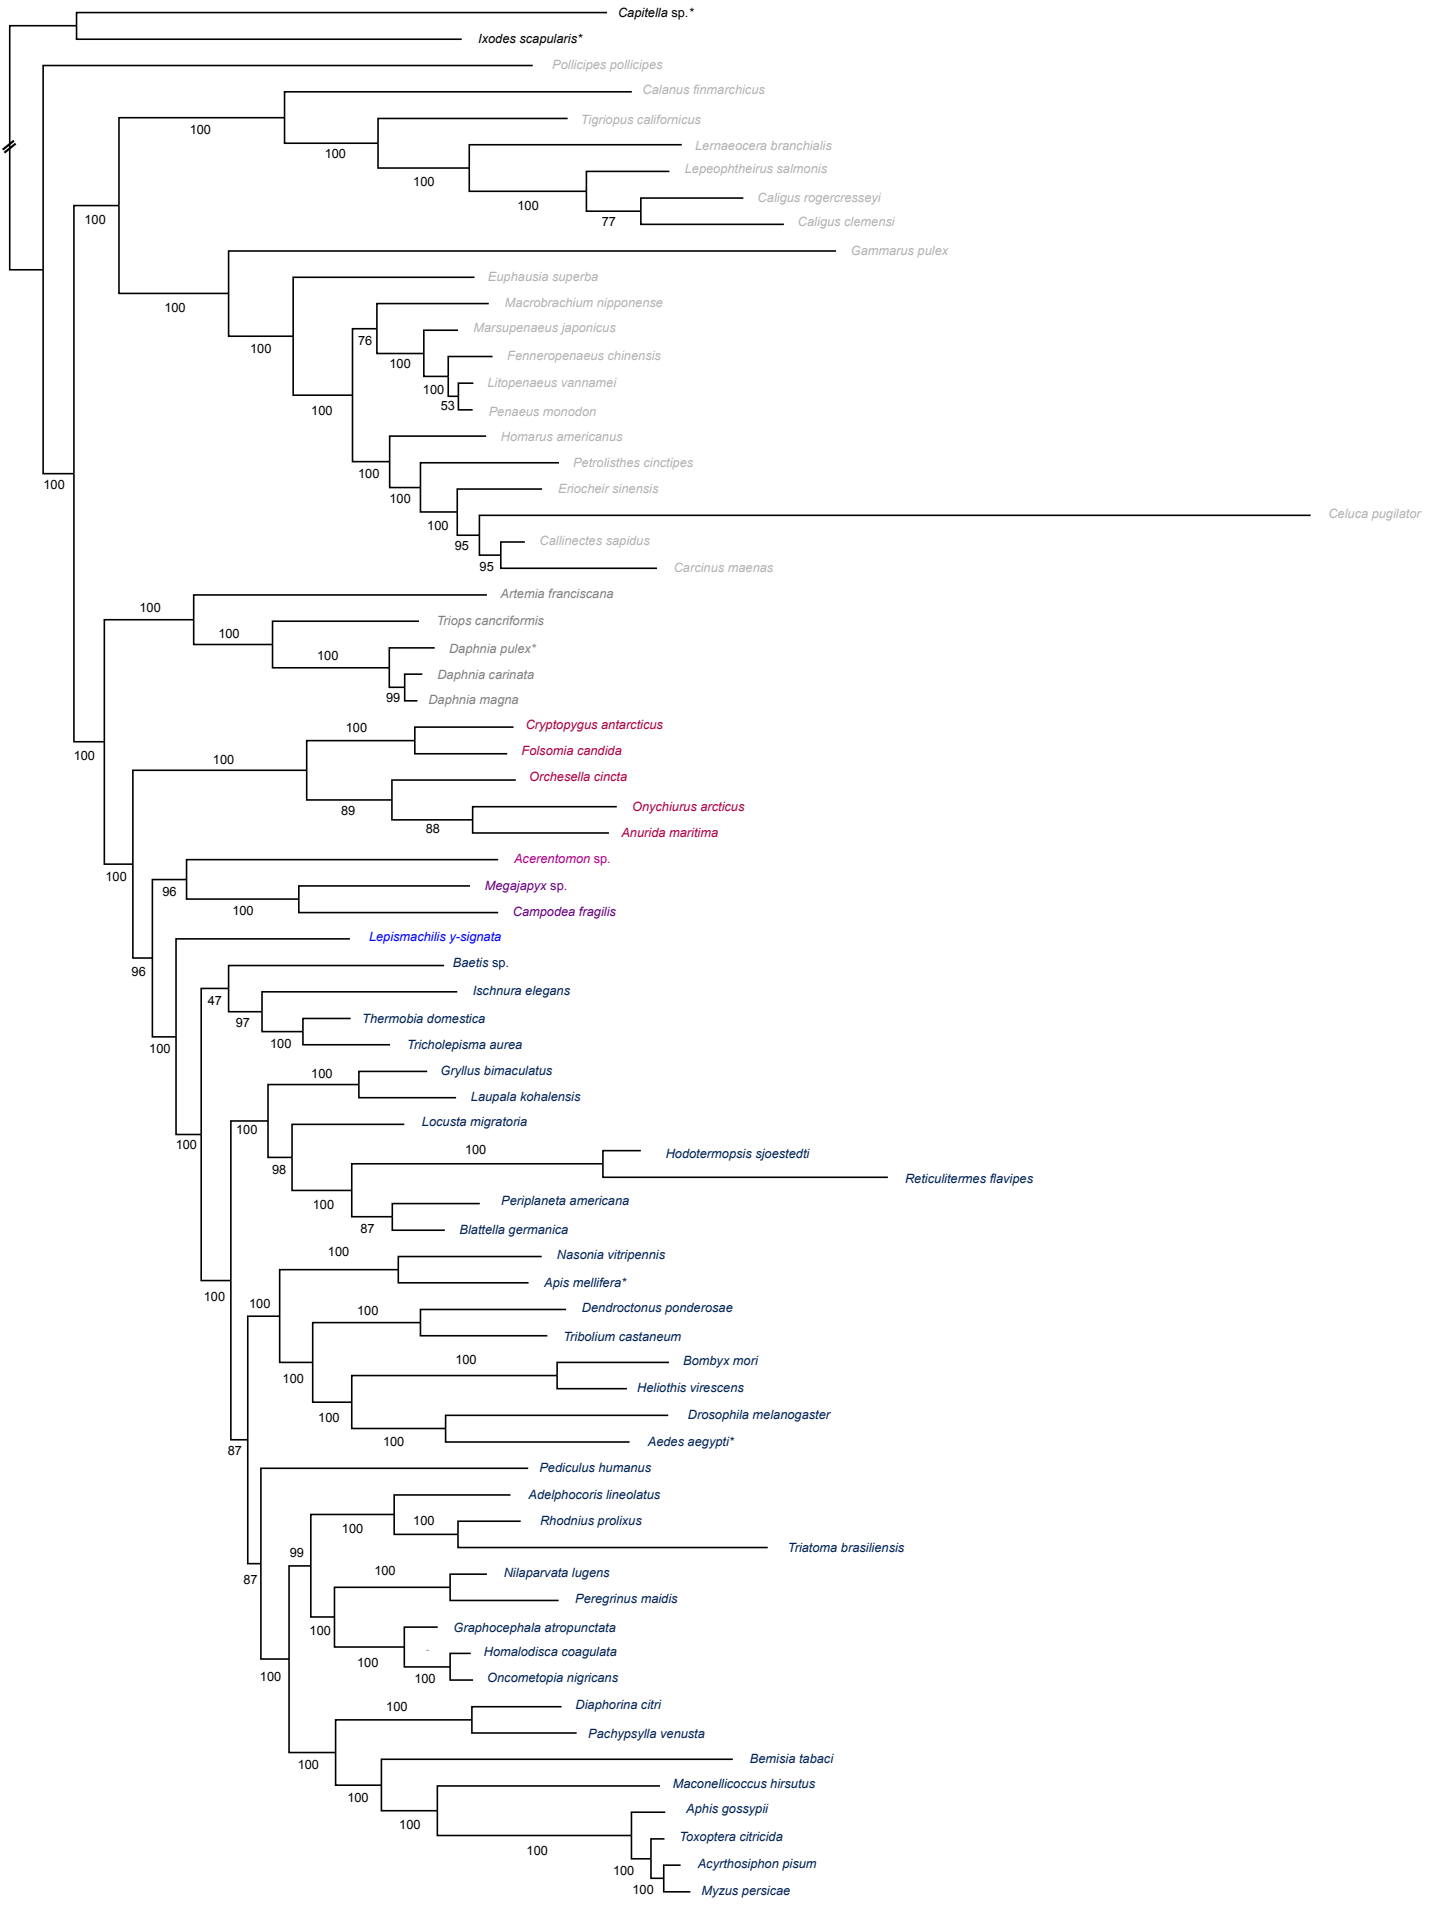

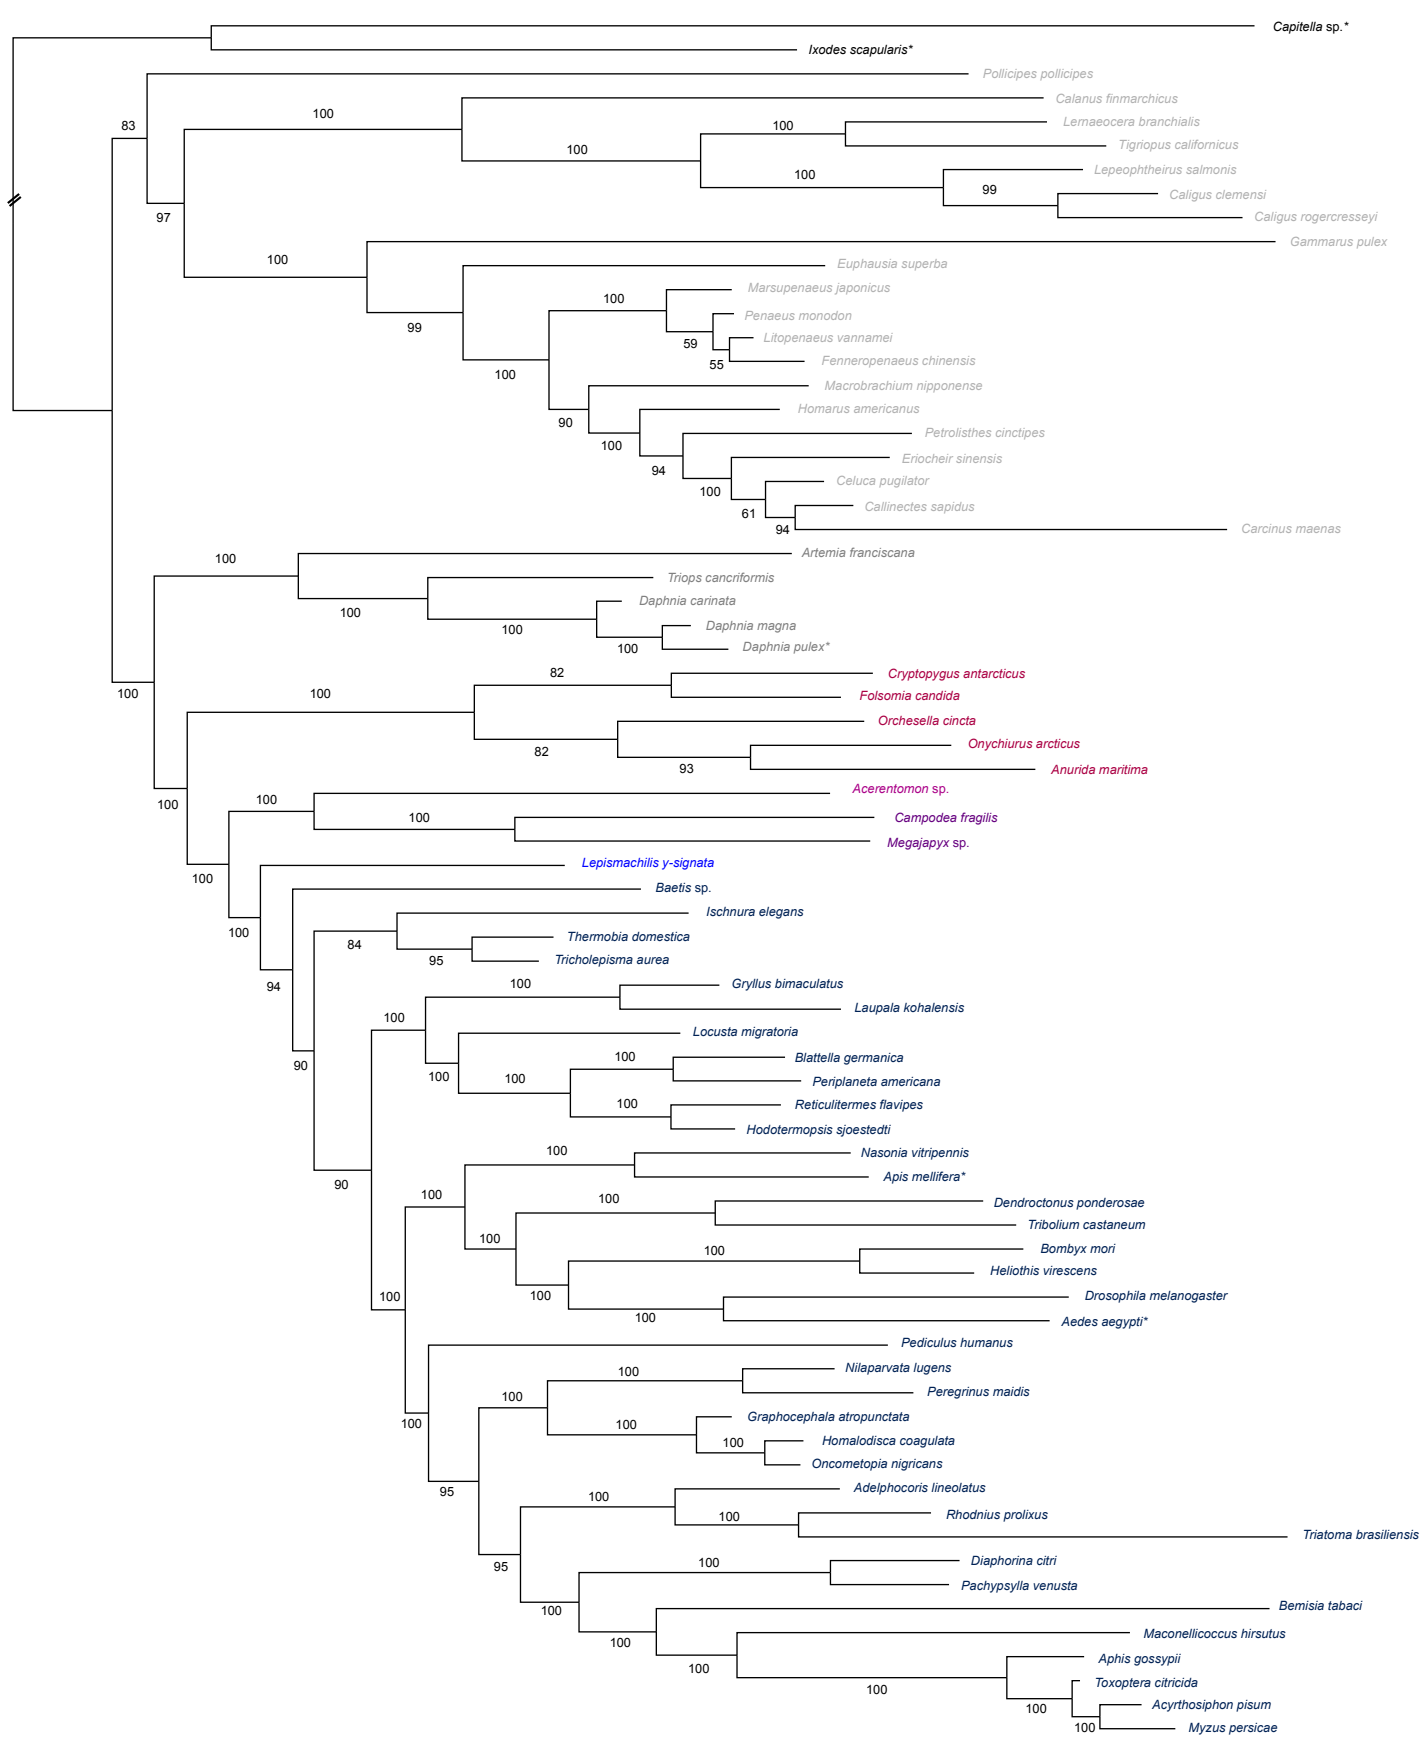

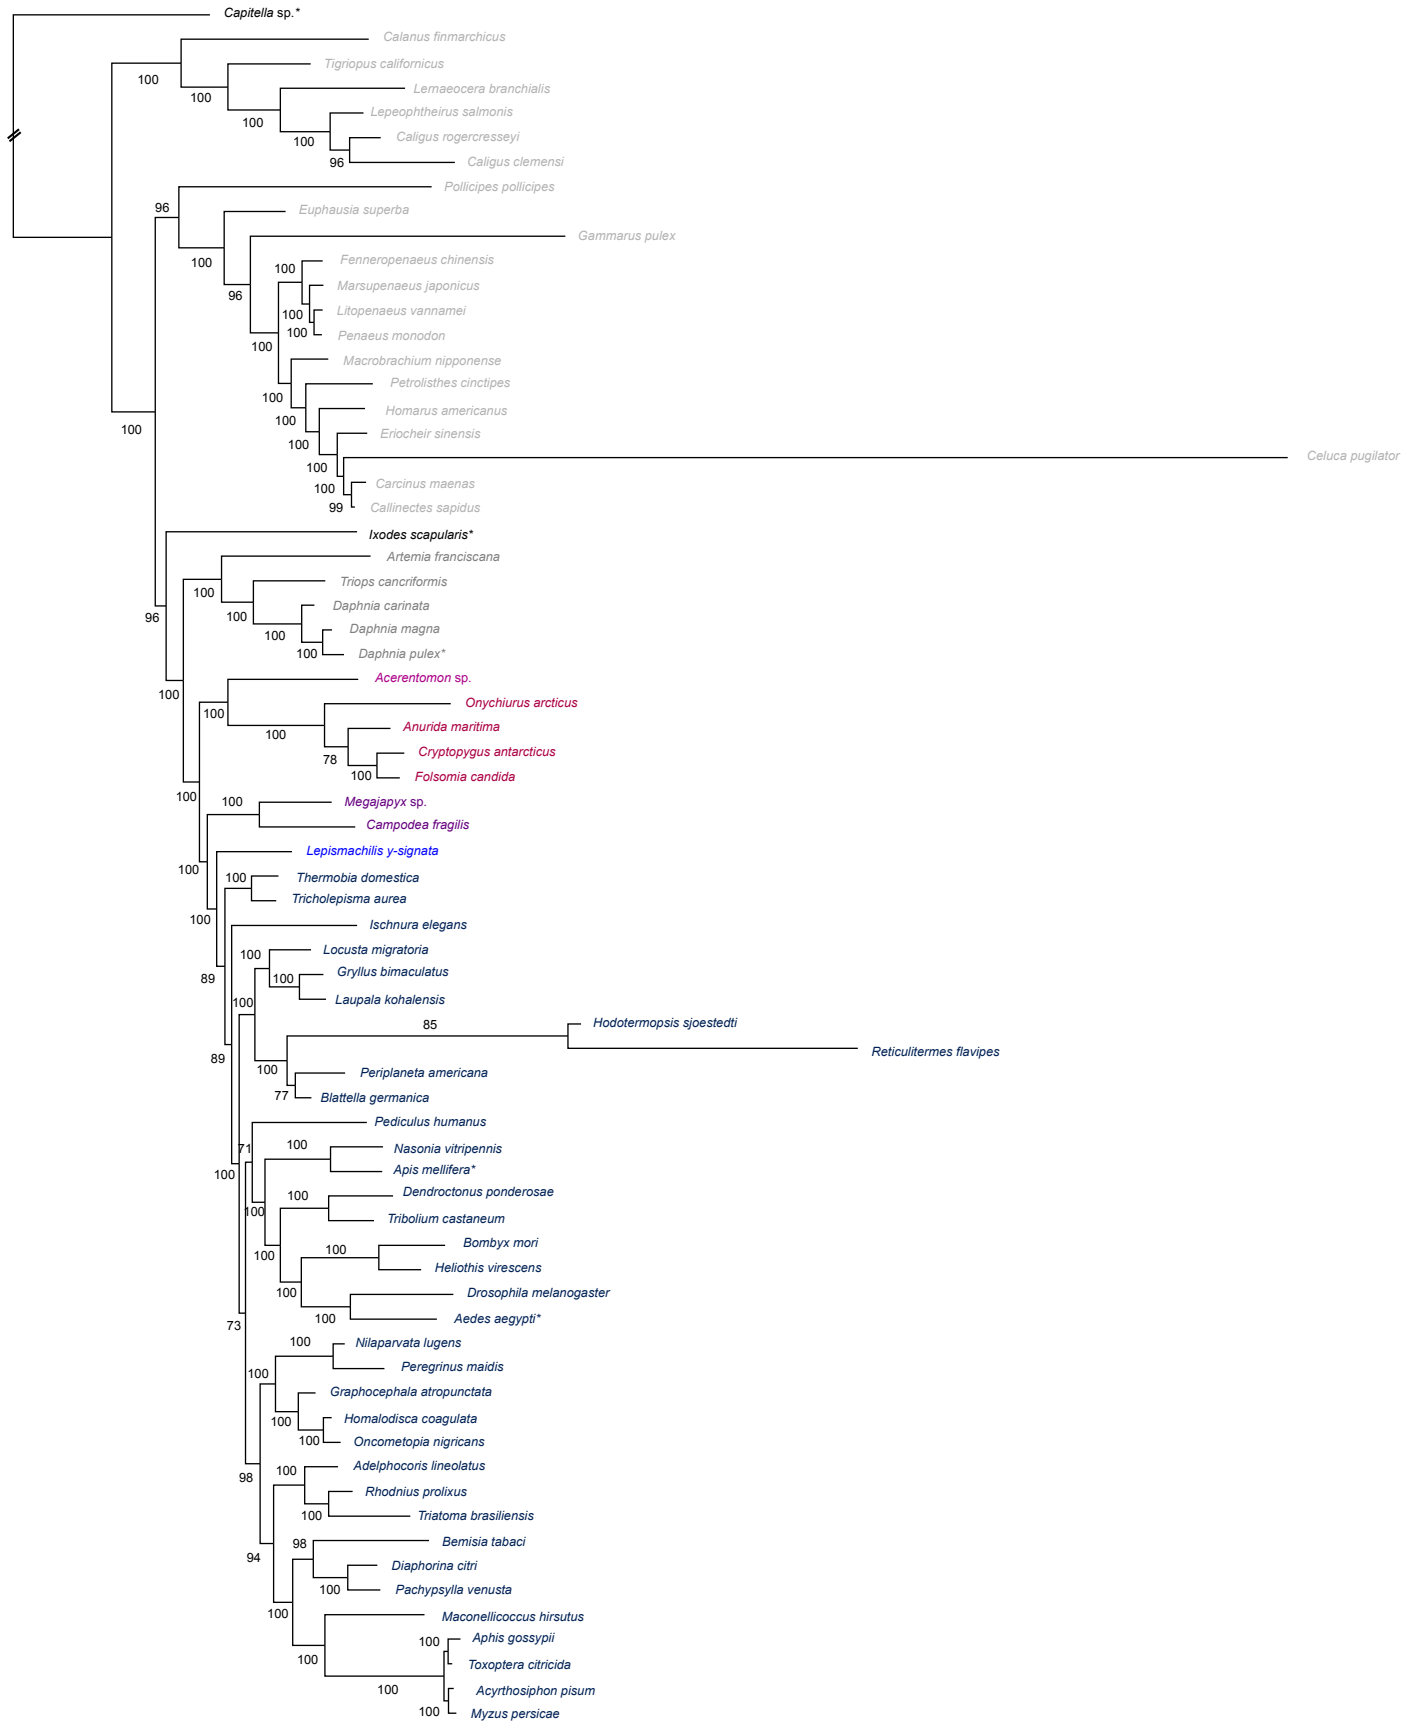

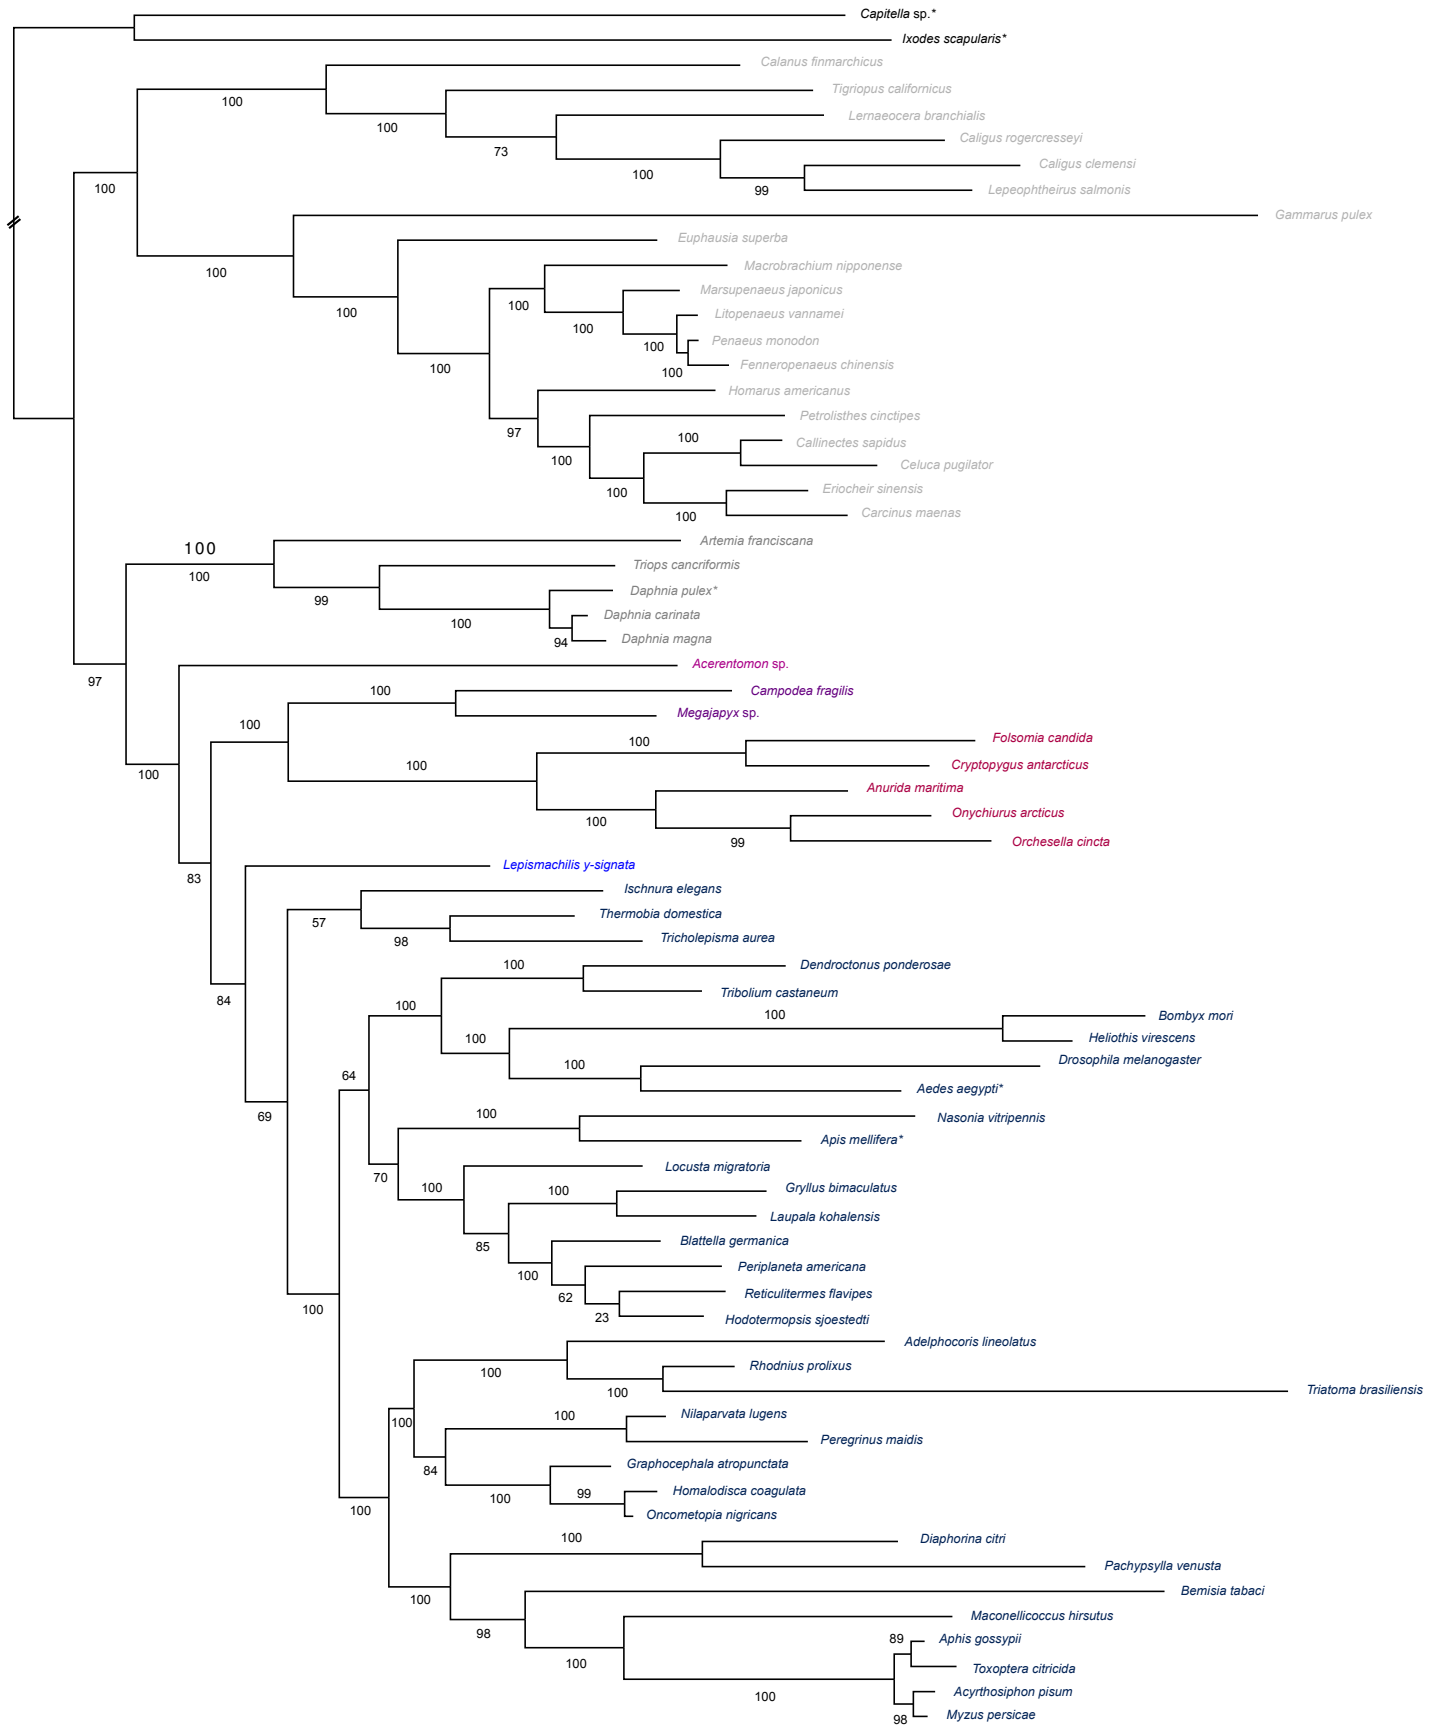

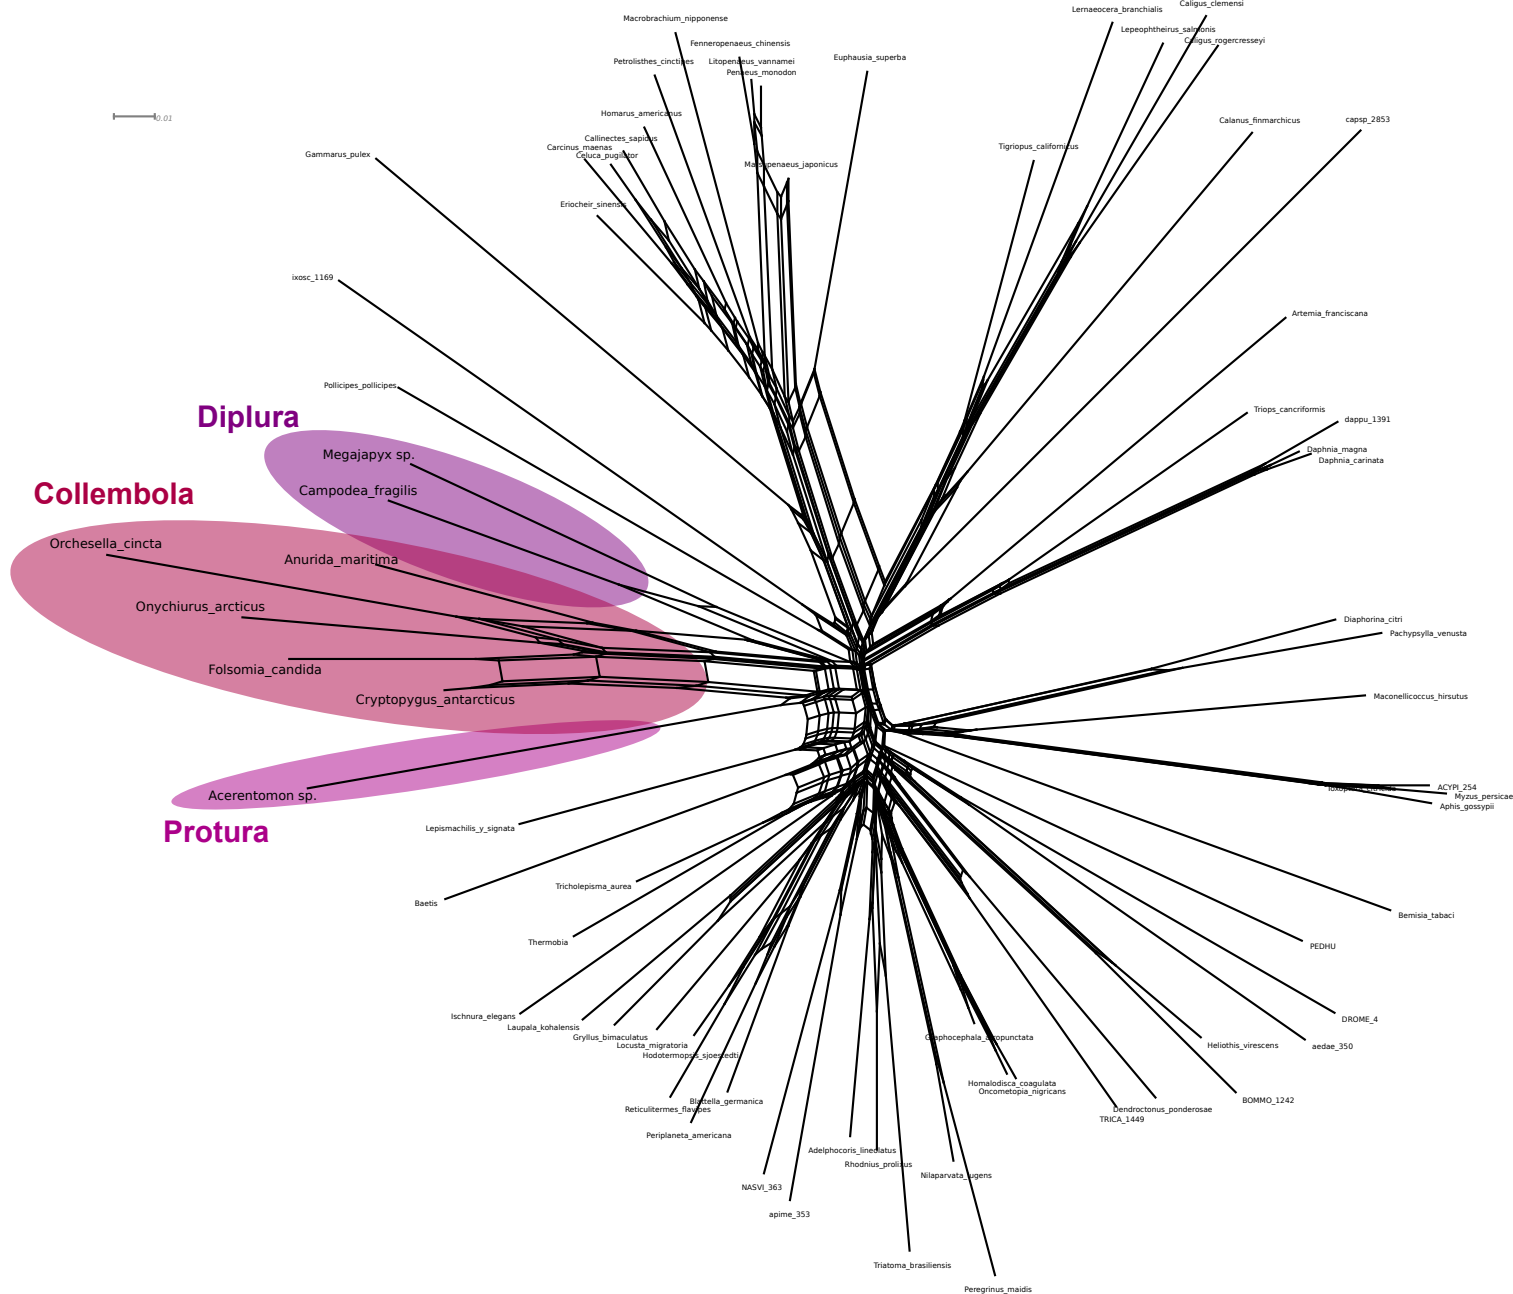



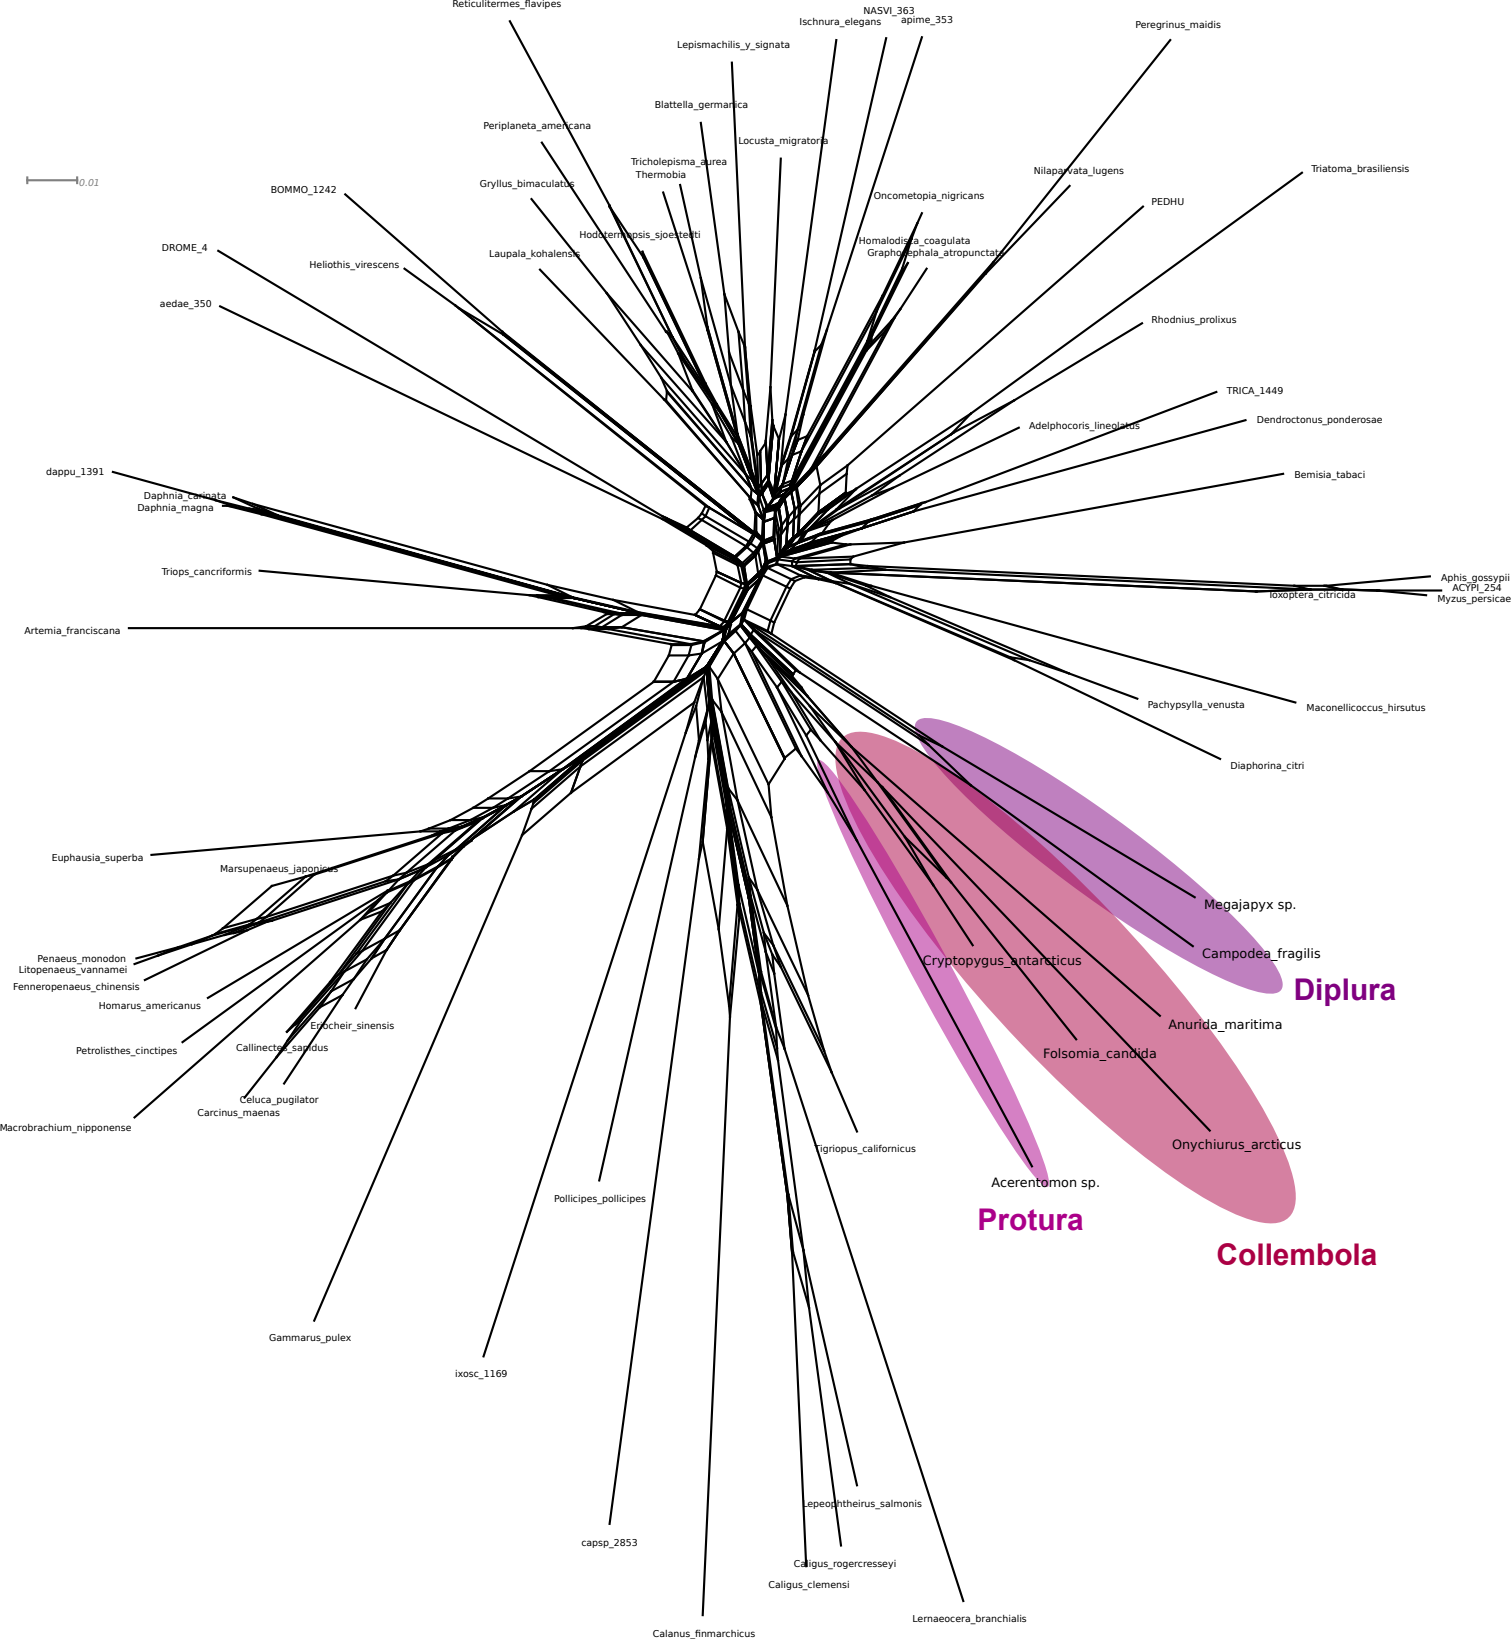

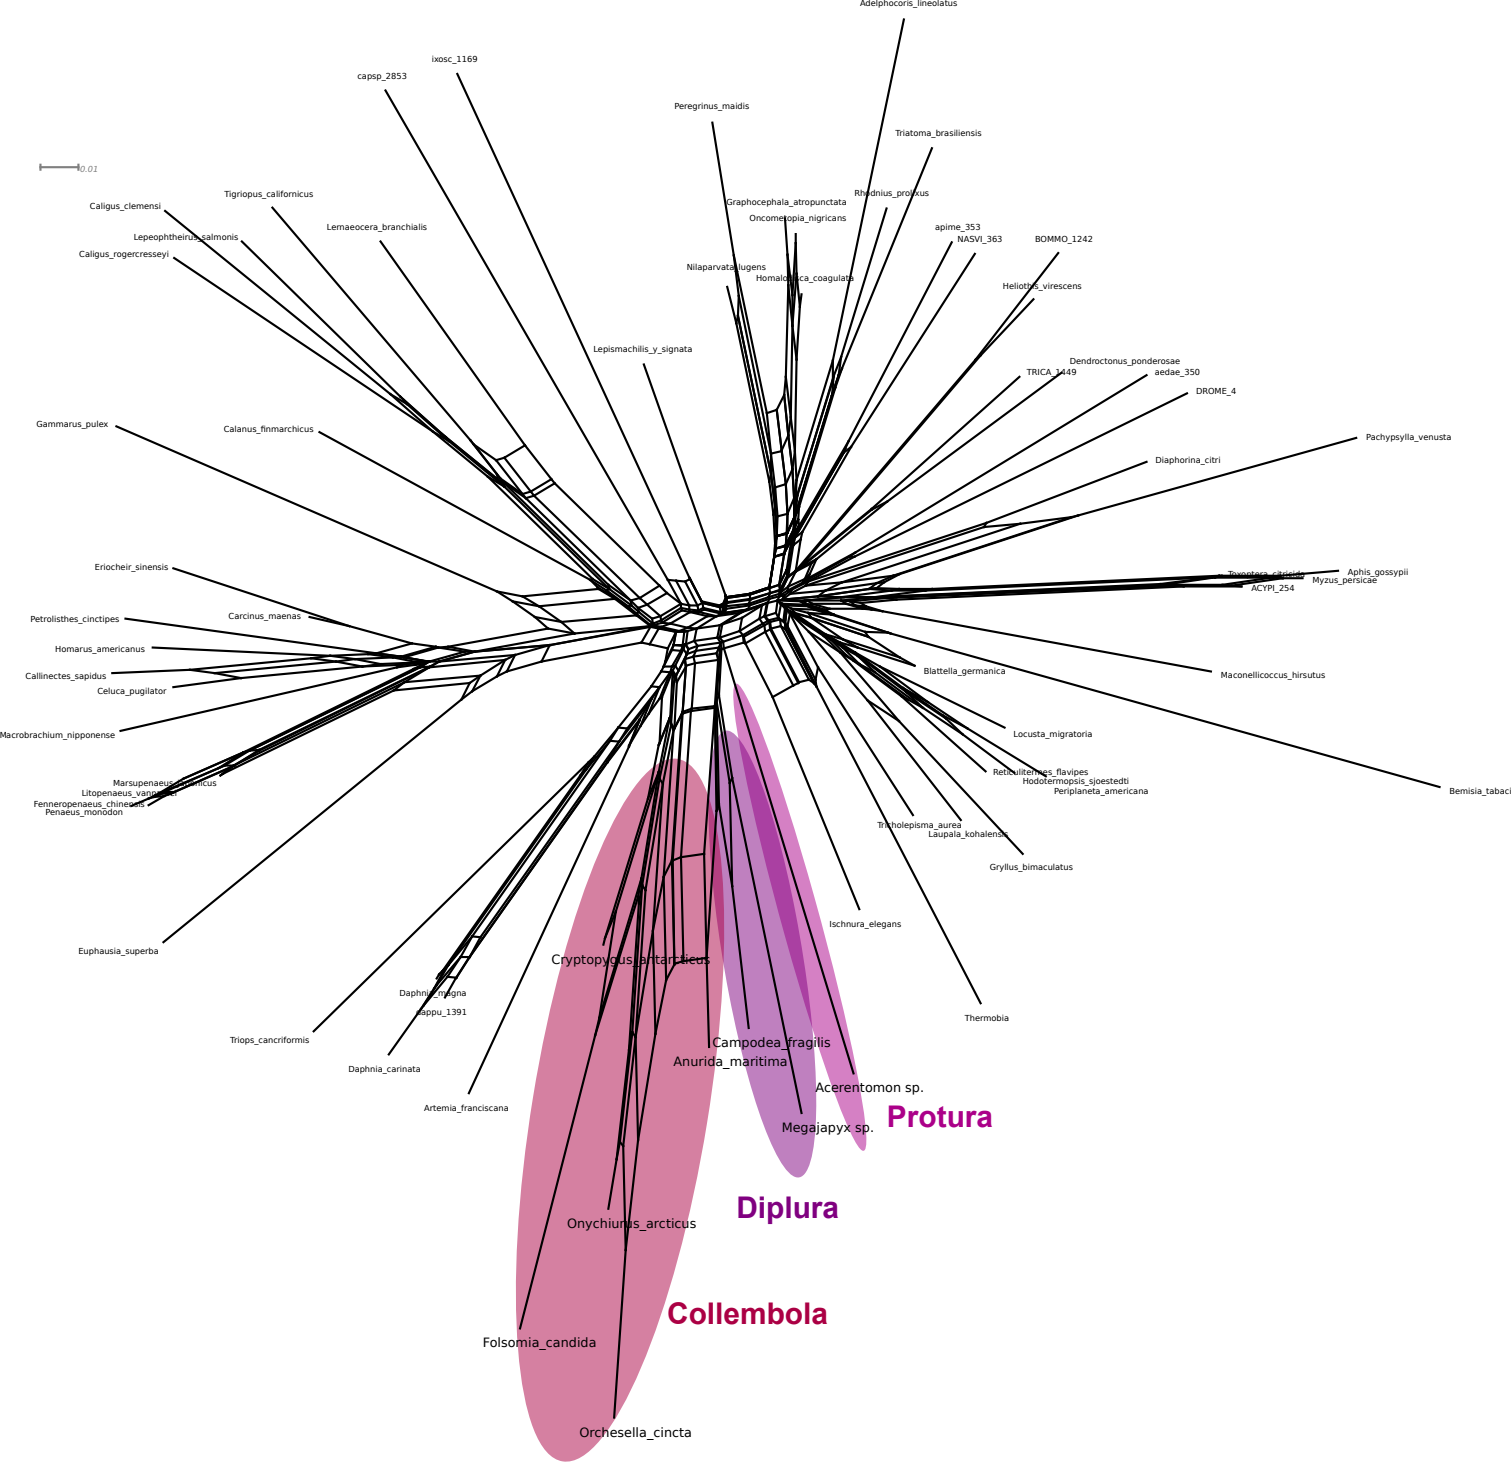



**a**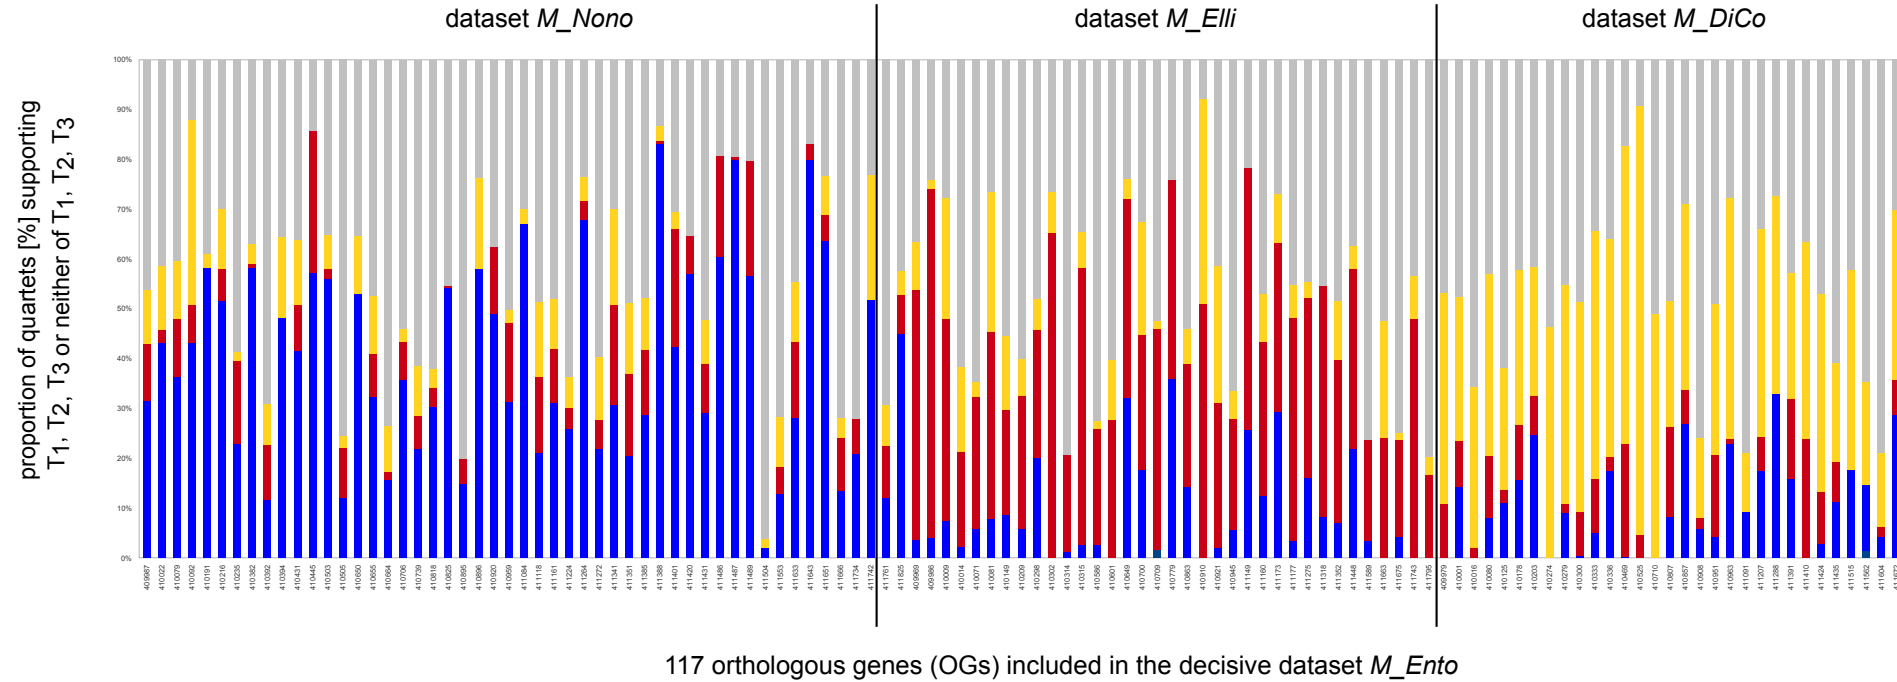**b**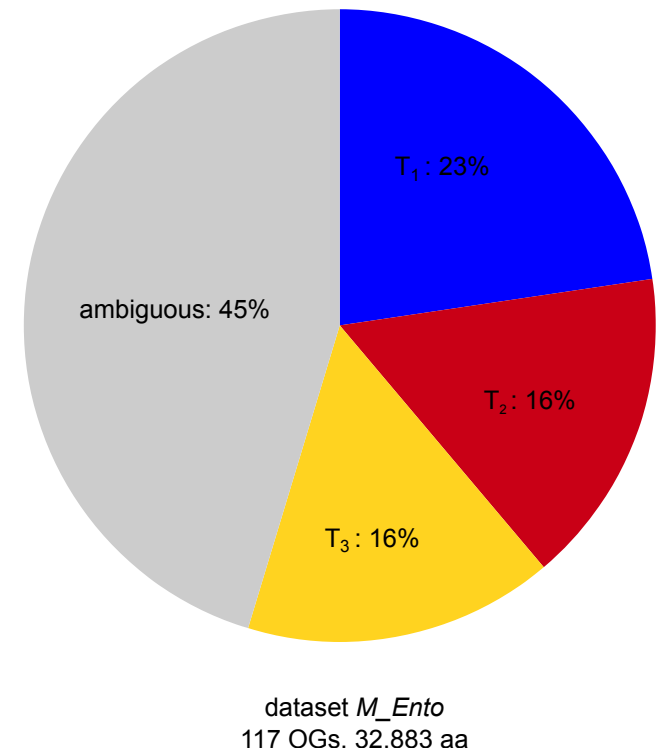

Supplement: supp_mst196_DellAmpio_et_al_Supplementary_Material_Fig_6-14.pdf [file supp_mst196_DellAmpio_et_al_Supplementary_Material_Fig_6-14.pdf]
